# Supplementary material for: Dietary Carotenoids Intake and the Risk of Gastric Cancer: A Case—Control Study in Korea
Source: MDPI journal article supplement (doi:10.3390/nu10081031), 2018-08-07
Supplement: s1 [file s1]

**Table S1.** Gender-specific ORs and 95% CIs of GC according to tertiles of dietary lycopene intake stratified by *H. pylori* infection status <sup>a</sup>.

|                                 | Median Intake<br>( $\mu\text{g/day}$ ) | <i>H. pylori</i> -Positive |         |             |         | <i>H. pylori</i> -Negative |                          |         |             |         |             |
|---------------------------------|----------------------------------------|----------------------------|---------|-------------|---------|----------------------------|--------------------------|---------|-------------|---------|-------------|
|                                 |                                        | No. of<br>Controls/Cases   | Model 1 |             | Model 2 |                            | No. of<br>Controls/Cases | Model 1 |             | Model 2 |             |
|                                 |                                        |                            | OR      | (95% CI)    | OR      | (95% CI)                   |                          | OR      | (95% CI)    | OR      | (95% CI)    |
| <b>Lycopene</b>                 |                                        |                            |         |             |         |                            |                          |         |             |         |             |
| Men ( <i>n</i> = 790)           |                                        |                            |         |             |         |                            |                          |         |             |         |             |
| T1                              | 268.48                                 | 114/129                    | 1.00    |             | 1.00    |                            | 60/9                     | 1.00    |             | 1.00    |             |
| T2                              | 934.05                                 | 105/61                     | 0.51    | (0.34–0.77) | 0.55    | (0.34–0.88)                | 67/4                     | 0.41    | (0.12–1.40) | 0.52    | (0.12–2.21) |
| T3                              | 2, 963.59                              | 114/62                     | 0.48    | (0.32–0.72) | 0.57    | (0.36–0.91)                | 60/5                     | 0.54    | (0.17–1.70) | 0.86    | (0.21–3.45) |
| <i>p</i> for trend <sup>b</sup> |                                        |                            | 0.001   |             | 0.043   |                            |                          | 0.417   |             | 0.985   |             |
| Women ( <i>n</i> = 431)         |                                        |                            |         |             |         |                            |                          |         |             |         |             |
| T1                              | 442.87                                 | 57/62                      | 1.00    |             | 1.00    |                            | 38/7                     | 1.00    |             | 1.00    |             |
| T2                              | 1,528.34                               | 50/40                      | 0.74    | (0.43–1.28) | 0.79    | (0.43–1.47)                | 45/6                     | 0.70    | (0.22–2.30) | 0.73    | (0.16–3.31) |
| T3                              | 4, 843.59                              | 46/28                      | 0.56    | (0.31–1.02) | 0.68    | (0.35–1.33)                | 50/2                     | 0.22    | (0.04–1.10) | 0.30    | (0.04–2.03) |
| <i>p</i> for trend <sup>b</sup> |                                        |                            | 0.068   |             | 0.282   |                            |                          | 0.064   |             | 0.218   |             |

<sup>a</sup> Dietary lycopene intake was categorized into tertiles according to the distribution of the control group among men (T1: <574.69, T2: 574.69–1,590.15, and T3:  $\geq$ 1,590.15) and women (T1: <898.55, T2: 898.55–2,572.63, and T3:  $\geq$ 2,572.63). <sup>b</sup> To test for trend across tertiles, the median intake for each tertile category was used as a continuous variable.

Model 1: adjusted for age; Model 2: adjusted for age, total caloric intake, family history of GC, smoking status, regular exercise, education level, occupation, and monthly household income.

**Table S2.** Gender-specific ORs and 95% CIs of GC according to tertiles of dietary lycopene intake stratified by smoking status <sup>a</sup>.

|                                 | Median Intake<br>( $\mu\text{g/day}$ ) | No. of<br>Controls/Cases | Ever-Smoker <sup>b</sup> |             |         |             | Non-Smoker               |         |             |         |             |
|---------------------------------|----------------------------------------|--------------------------|--------------------------|-------------|---------|-------------|--------------------------|---------|-------------|---------|-------------|
|                                 |                                        |                          | Model 1                  |             | Model 2 |             | No. of<br>Controls/Cases | Model 1 |             | Model 2 |             |
|                                 |                                        |                          | OR                       | (95% CI)    | OR      | (95% CI)    |                          | OR      | (95% CI)    | OR      | (95% CI)    |
| <b>Lycopene</b>                 |                                        |                          |                          |             |         |             |                          |         |             |         |             |
| Men ( $n = 810$ )               |                                        |                          |                          |             |         |             |                          |         |             |         |             |
| T1                              | 268.48                                 | 145/121                  | 1.00                     |             | 1.00    |             | 35/17                    | 1.00    |             | 1.00    |             |
| T2                              | 934.05                                 | 146/57                   | 0.47                     | (0.32–0.69) | 0.49    | (0.30–0.80) | 34/8                     | 0.48    | (0.19–1.27) | 1.42    | (0.37–5.51) |
| T3                              | 2,963.59                               | 143/53                   | 0.44                     | (0.30–0.66) | 0.45    | (0.27–0.73) | 37/14                    | 0.78    | (0.33–1.82) | 1.44    | (0.43–4.79) |
| <i>p</i> for trend <sup>c</sup> |                                        |                          | <0.001                   |             | 0.005   |             |                          | 0.816   |             | 0.628   |             |
| Women ( $n = 434$ )             |                                        |                          |                          |             |         |             |                          |         |             |         |             |
| T1                              | 442.87                                 | 2/5                      | 1.00                     |             | 1.00    |             | 94/63                    | 1.00    |             | 1.00    |             |
| T2                              | 1,528.34                               | 4/7                      | 0.50                     | (0.05–4.67) | -       | -           | 93/39                    | 0.63    | (0.38–1.02) | 0.78    | (0.44–1.38) |
| T3                              | 4,843.59                               | 6/4                      | 0.20                     | (0.02–1.86) | -       | -           | 91/26                    | 0.43    | (0.25–0.73) | 0.64    | (0.34–1.20) |
| <i>p</i> for trend <sup>c</sup> |                                        |                          | 0.139                    |             | -       |             |                          | 0.003   |             | 0.183   |             |

<sup>a</sup> Dietary lycopene intake was categorized into tertiles according to the distribution of the control group among men (T1: <574.69, T2: 574.69–1,590.15, and T3:  $\geq$ 1,590.15) and women (T1: <898.55, T2: 898.55–2,572.63, and T3:  $\geq$ 2,572.63). <sup>b</sup> Subjects who currently smoke or previously smoked were combined as ever-smokers. <sup>c</sup> To test for trend across tertiles, the median intake for each tertile category was used as a continuous variable.

Model 1: adjusted for age; Model 2: adjusted for age, total caloric intake, family history of GC, smoking status, regular exercise, education level, occupation, and monthly household income.
